# Supplementary material for: Perceptions of the use of a 3D-printed manufactured educational simulator for incisions and sutures
Source: Research Square preprint supplement (doi:10.21203/rs.3.rs-6701026/v1), 2025-06-09
Supplement: Supplementary file 1 [file 01c3e4c2a6bed004098b916f.docx]

**Supplementary Data 1 – Cronbach’s Alpha and Factor Analysis**

**Cronbach’s Alpha**

The internal consistency of the evaluation questionnaire was analyzed using Cronbach’s alpha on a dataset of 69 participants and 10 items.

Cronbach’s alpha = 0.84
95% Confidence Interval: [0.77 – 0.89]
This indicates a good level of internal reliability.

**TABLE 1: Alpha if Item Deleted**

| Item Removed | Alpha if Deleted |
| --- | --- |
| Item 1 | 0.82 |
| Item 2 | 0.81 |
| Item 3 | 0.83 |
| Item 4 | 0.80 |
| Item 5 | 0.84 |
| Item 6 | 0.82 |
| Item 7 | 0.81 |
| Item 8 | 0.79 |
| Item 9 | 0.82 |
| Item 10 | 0.80 |

**Factor Analysis (factanal)**

An exploratory factor analysis was conducted using the 'factanal' function in R, extracting 2 factors.

- Sample size: 69
- Number of items: 10
- Method: Maximum Likelihood
- Chi-square test of factor adequacy: χ² = 53.66, df = 26, p = 0.00112
- Proportion of variance explained: 51.5% (Factor 1: 28.7%, Factor 2: 22.8%)

An exploratory factor analysis was conducted on the 10-item questionnaire using the maximum likelihood method (factanal in R). The two-factor model yielded a statistically significant chi-square test (χ² = 53.66, df = 26, *p* = 0.00112), suggesting that the fit is not perfect. However, this result is not uncommon in medium-sized samples, as the chi-square test is highly sensitive to sample size.

The two extracted factors explained a total of 51.5% of the variance, which is considered satisfactory in educational and social sciences. Factor 1 accounted for 28.7% of the variance, and Factor 2 for 22.8%, indicating a meaningful multidimensional structure. The factor loadings showed logical clustering of items, corresponding to perceptual and pedagogical dimensions relevant to the study's objectives.

Together with a high Cronbach’s alpha coefficient (0.84), these findings support the **internal consistency and construct validity of the questionnaire** used to assess participants' perceptions of the 3D-printed surgical simulator.

**Factor Loadings**

TABLE 2: : Two-factor exploratory factor analysis

| Item | Factor 1 | Factor 2 |
| --- | --- | --- |
| item1 | 0.639 | 0.027 |
| item2 | 0.483 | 0.221 |
| item3 | 0.627 | 0.335 |
| item4 | 0.474 | 0.348 |
| item5 | 0.337 | 0.719 |
| item6 | 0.119 | 0.726 |
| item7 | 0.020 | 0.772 |
| item8 | 0.684 | 0.110 |
| item9 | 0.834 | 0.087 |
| item10 | 0.568 | 0.579 |

All analyses were conducted using R software (version 4.4.2, R Foundation for Statistical Computing, Vienna, Austria) with 'psy', 'psych' and 'stats' packages.
