# Supplementary material for: Perceptions of the use of a 3D-printed manufactured educational simulator for incisions and sutures
Source: Research Square preprint supplement (doi:10.21203/rs.3.rs-6701026/v1), 2025-06-09
Supplement: Supplementary file 2 [file 335ca6f138ca4fc0f93a9a49.docx]

| **items** | All  (N=69) | Undergraduate students  (N=27) | Postgraduate students  (N=19) | Expert  (N=23) |
| --- | --- | --- | --- | --- |
| **1 Visual Appearance**  (mean (SD)) | 4.23 (0.75) | 4.19 (0.79) | 4.47 (0.51) | 4.09 (0.85) |
| **2 Gum Texture**  (mean (SD)) | 4.14 (0.73) | 4.15 (0.91) | 4.26 (0.56) | 4.04 (0.64) |
| **3 Scalpel Insertion Feedback**  (mean (SD)) | 4.00 (0.94) | 4.11 (1.01) | 4.11 (0.94) | 3.78 (0.85) |
| **4 Suture feedback**  **(mean (SD))** | 3.94 (0.78) | 3.93 (0.73) | 4.00 (0.94) | 3.91 (0.73) |
| **5 Incision realism, compare with animal model** (mean (SD)) | 3.41 (1.24) | 3.67 (1.18) | 3.63 (0.96) | 2.91 (1.41) |
| **6 Gingival Detachment**  **Sensation, compare with animal model** (mean (SD)) | 3.17 (1.18) | 3.07 (1.11) | 3.26 (1.28) | 3.22 (1.20) |
| **7 Suturing Feedback, compare with animal model** (mean (SD)) | 3.48 (1.02) | 3.59 (0.93) | 3.63 (0.90) | 3.22 (1.20) |
| **8 Educational Interest**  (mean (SD)) | 4.52 (0.68) | 4.59 (0.64) | 4.42 (0.90) | 4.52 (0.51) |
| **9 Overall appreciation**  (mean (SD)) | 4.48 (0.58) | 4.56 (0.58) | 4.47 (0.61) | 4.39 (0.58) |
| **10 Preference over Animal Model** (mean (SD)) | 3.88 (1.09) | 4.22 (1.12) ***** | 3.84 (1.01) ***** | 3.53 (1.04) ***** |
| **Visual** (mean (SD)) | 4.23 (0.75) | 4.19 (0.79) | 4.47 (0.51) | 4.09 (0.85) |
| **Tactile** (mean (SD)) | 3.69 (0.70) | 3.75 (0.68) | 3.82 (0.66) | 3.51 (0.73) |
| **Pedagogy** (mean (SD)) | 4.50 (0.58) | 4.57 (0.57) | 4.45 (0.72) | 4.46 (0.47) |
| **For the same question, the values of the student, graduate student and senior marked with an asterisk are significantly different with p<0.05** | | | | |

**Table 2:** Result of items assessed by the questionnaire (mean, SD)
