# Supplementary material for: Perceptions of the use of a 3D-printed manufactured educational simulator for incisions and sutures
Source: Research Square preprint supplement (doi:10.21203/rs.3.rs-6701026/v1), 2025-06-09
Supplement: Supplementary file 3 [file d28de26b7fd6a72f558a39b4.docx]

**Table 1.** Satisfaction questionnaire given to the participants.

☐ Undergraduate students ☐ Expert ☐ Postgraduate students

|  | Items | Strongly disagree (1) | Disagree (2) | Neither agree nor disagree (3) | Agree (4) | Strongly agree (5) |
| --- | --- | --- | --- | --- | --- | --- |
| Visual Aspect | 1 - The visual appearance of the simulator models seemed realistic to me. |  |  |  |  |  |
|  |  |  |  |  |  |
| Tactile Aspect | 2 - The texture of the gum seemed realistic to me. |  |  |  |  |  |
| 3 - The texture of the gum seemed realistic to me in terms of haptic feedback when inserting the scalpel. |  |  |  |  |  |
| 4 - The texture of the gum seemed realistic to me in terms of haptic feedback during sutures. |  |  |  |  |  |
| 5 - The sensation of incision in the gum is closer to reality than what is felt with an animal model. |  |  |  |  |  |
| 6 - The sensation of gingival detachment is closer to reality than what is felt with an animal model. |  |  |  |  |  |
| 7 - The sensation during suturing is closer to reality than what is felt with an animal model. |  |  |  |  |  |
| Pedagogical Interest | 8 - I would appreciate if this simulator were used in initial or continuing education for learning incisions and sutures. |  |  |  |  |  |
| 9 - Overall, I appreciated these models. |  |  |  |  |  |
|  | 10 - I would prefer to train on this model rather than on an animal model. |  |  |  |  |  |
